# Supplementary material
Source: publisher figshare collection journal article supplement (https://wiley.figshare.com/articles/dataset/_/3558546)
Supplement: Supplementary file 1 [file 1 › appendix-C.htm]

Ecological Archives E095-032-A3


*Ecological Archives* E095-032-A3

Inés Ibáñez, Sarah McCarthy-Neumann. 2014. Integrated assessment of the direct and indirect effects of resource gradients on tree species recruitment. *Ecology* 95:364–375. http://dx.doi.org/10.1890/13-0685.1

Appendix C. Analytical methods: detailed description of the model and parameter estimation.

> View / download PDF.


---

[Back to E095-032]
