# Supplementary material
Source: publisher figshare collection journal article supplement (https://wiley.figshare.com/articles/dataset/_/3558546)
Supplement: Supplementary file 1 [file 1 › appendix-C.pdf]

## APPENDIX C

### Analytical methods – Parameter estimation

*Mycorrhizal colonization*- Poisson likelihood for zero and not-zero counts with mean  $\lambda_i$ :

$$P(M = m) = \begin{cases} \varphi + (1 - \varphi)e^{-\lambda} & \text{for } m = 0 \\ (1 - \varphi) \frac{1}{m!} \lambda^m e^{-\lambda} & \text{for } m > 0 \end{cases}$$

And process models:

$$\text{logit}(\varphi_i) \sim \text{Normal}(\omega_1 \text{plot}(i), \text{year}(i) + \omega_2 \text{plant height}_i, \sigma_\varphi^2)$$

$$\log(\lambda_i) \sim \text{Normal}(\alpha_1 \text{plot}(i), \text{year}(i) + \alpha_2 \text{habitat}(i) \text{light}_{\text{plot}(i), \text{year}(i)} + \alpha_3 \text{soil moisture}_{\text{plot}(i), \text{year}(i)}, \sigma_\lambda^2)$$

To estimate the probability of zero colonization,  $\varphi$ , we included a random effect for each plot and year,  $\omega_1 \text{plot}(i), \text{year}(i)$ , that would then reflect the particular mycorrhizal community associated to that plot and year (for which we did not have any specific information). This parameter was estimated from a prior distribution,  $\omega_1 \text{plot}, \text{year} \sim \text{Normal}(\omega_{1m}, \sigma_\omega^2)$ , with  $\omega_{1m} \sim \text{Normal}(0, 10000)$  and  $\sigma_\omega \sim \text{Uniform}(0, 100)$ . The fixed effect associated with initial plant height,  $\omega_2$ , was estimated from a non-informative prior distribution,  $\omega_2 \sim \text{Normal}(0, 10000)$ . Individual random effects were also included,  $1/\sigma_\varphi^2 \sim \text{Gamma}(0.01, 0.01)$ .

The mean of the percent colonization,  $\lambda$ , was estimated as a function of: plot and year random effects,  $\alpha_1 \text{plot}, \text{year} \sim \text{Normal}(\alpha_{1m}, \sigma_\alpha^2)$ , with  $\alpha_{1m} \sim \text{Normal}(0, 10000)$  and  $\sigma_\alpha \sim \text{Uniform}(0, 100)$ ; of light levels,  $\alpha_2 \text{habitat}$ , which estimated independently for each of our habitats, canopy and gap,  $\alpha_2 \text{habitat} \sim \text{Normal}(0, 10000)$ ; and of soil moisture,  $\alpha_3 \sim \text{Normal}(0, 10000)$ . Here we also included individual random effects,  $1/\sigma_\lambda^2 \sim \text{Gamma}(0.01, 0.01)$ .

*Growth rates*- Normal likelihood:

$$Growth_i \sim Normal(G_i, \sigma_G^2)$$

And process model:

$$G_i = gmax_i \frac{light_i - lo_i}{light_i + \theta_i} + \delta \text{ soil moisture}_{plot(i), year(i)}$$

$gmax_i$  represents the maximum growth rate (asymptote) for an individual, and is modeled as a function of the individuals initial plant height and individual random effects,

$gmax_i \sim Normal(\gamma_1 + \gamma_2 \text{ plant height}_i, \sigma_{gmax}^2)$ , with  $\gamma_* \sim Normal(0, 10000)$  and

$1/\sigma_{gmax}^2 \sim Gamma(0.01, 0.01)$ . The compensation point, minimum amount of light necessary to

start growth,  $lo$ , was estimated as a function of plot's total inorganic nitrogen ( $NO_3 + NH_4$ ) and

individual random effects,  $lo_i \sim Normal(\kappa_1 + \kappa_2 \text{ Nitrogen}_{plot(i)}, \sigma_{lo}^2)$ , with  $\kappa_* \sim Normal(0, 10000)$  and

$1/\sigma_{lo}^2 \sim Gamma(0.01, 0.01)$ . And the half saturation parameter,  $\theta$ , was estimated as a function of

percent mycorrhizal colonization and individual random effects,  $\theta_i \sim Normal(\mu_1 + \mu_2 M_{AMFi} + \mu_3$

$M_{EMFi}, \sigma_\theta^2)$ , where  $\mu_* \sim Normal(0, 10000)$  and  $1/\sigma_\theta^2 \sim Gamma(0.01, 0.01)$ . The fixed effects

associated with soil moisture,  $\delta$ , were estimated as  $\delta \sim Normal(0, 10000)$ , and the variance

associated to the likelihood was again assigned a non-informative prior distribution

$1/\sigma_G^2 \sim Gamma(0.01, 0.01)$

*Survival*- Binomial likelihood:

$$N2_{plot, year} \sim Binomial(N1_{plot, year}, p_{plot, year})$$

And process model:

$$\text{logit}(p_{plot, year}) = \beta_1 + \beta_2 G_{Pplot, year} + \beta_3 \text{habitat light}_{plot, year} + \beta_4 \text{soil moisture}_{plot, year} + \beta_5 M_P.$$

$$AMF_{plot,year} + \beta_6 M_{P-EMF_{plot,year}}$$

The probability of surviving,  $p_{plot,year}$ , was estimated as a function of several intrinsic (growth rate and mycorrhizal colonization) and extrinsic (light and soil moisture availability) factors to account for complex interactions and indirect effects of the driving variables. The intercept and fixed effects coefficients were estimated as  $\beta_* \sim Normal(0, 10000)$ .

We tried several models that differed on the inclusion or not, and their allocation (e.g., nitrogen affecting  $lo$ ,  $\theta$  or  $gmax$ ) and used Predicted Loss (Gelfand and Ghosh 1998) for our model selection criteria as this full model was too complicated to have a reliable estimate of the effective number of parameters necessary to calculate DIC (Deviance Information Criteria; Spiegelhalter et al. 2000). Posterior Predicted Loss is based on the prediction and does not penalize based on the number of parameters but based on the predicted variance. Predicted loss is estimated by adding the goodness of fit, the error sum of squares, and the predictive variance, which would account for overfitting.

#### LITERATURE CITED

- Gelfand, A. E. and S. K. Ghosh. 1998. Model choice: A minimum posterior predictive loss approach. *Biometrika* 85:1–11.
- Spiegelhalter, D. J., Best, N., Carlin, B.P., and Linde, A.V.D. 2000. Bayesian measures of model complexity and fit. *Journal of the Royal Statistical Society: Series B (Statistical Methodology)* 64:583–639.
